# Supplementary material for: Communicating pain: emerging axonal signaling in peripheral neuropathic pain
Source: Front Neuroanat. 2024 Jul 9;18:1398400. doi: 10.3389/fnana.2024.1398400 (PMC11265228; doi:10.3389/fnana.2024.1398400)
Supplement: SUPPLEMENTARY TABLE 1 — Information on the NeuP population studies. Here we report the studies per country used to create Figure 1. We were able to find only nineteen studies in the literature that investigated the prevalence of NeuP in the general population. These studies greatly varied in the number of cases examined, the use of controls, and the way the NeuP was evaluated. Moreover, different types of questionnaire to define NeuP were used, such as LANSS, DN4, PainDETECT. While all the questionnaires are extensively used as diagnostic tools, they don’t measure the same parameters. All these factors may partially explain the great variation in NeuP prevalence between countries. [file Table_1.xlsx]

## Sheet: Sheet1
Country	NeuP prevalence	Evaluation Method	Reference study
Australia	0.05	Physician assessment	Henderson, Joan et al. “Neuropathic and non-neuropathic chronic pain at GP encounters: Prevalence, patient characteristics, suffering and pregabalin use.” Australian family physician vol. 45,11 (2016): 783-786.
Austria	0.033	LANSS (web version)	Gustorff, B et al. “Prevalence of self-reported neuropathic pain and impact on quality of life: a prospective representative survey.” Acta anaesthesiologica Scandinavica vol. 52,1 (2008): 132-6. doi:10.1111/j.1399-6576.2007.01486.x
Benin	0.063	DN4 (door-to-door survey)	Adoukonou, T et al. “Prévalence et caractéristiques des douleurs chroniques avec caractère neuropathique en population générale à Parakou au nord du Bénin en 2012” [Prevalence and characteristics of chronic pain with neuropathic component at Parakou in northern Benin in 2012]. Revue neurologique vol. 170,11 (2014): 703-11. doi:10.1016/j.neurol.2014.07.013
Brazil	0.145	DN4, quality of life and sleep, and physician assessment	Udall, Margarita et al. “Epidemiology of physician-diagnosed neuropathic pain in Brazil.” Journal of pain research vol. 12 243-253. 7 Jan. 2019, doi:10.2147/JPR.S160504
Canada	7.7-11.5%	LANSS and DN4	VanDenKerkhof, Elizabeth G et al. “An Epidemiological Study of Neuropathic Pain Symptoms in Canadian Adults.” Pain research & management vol. 2016 (2016): 9815750. doi:10.1155/2016/9815750
France	0.072	Electronic health records	Chenaf, Chouki et al. “Prevalence of chronic pain with or without neuropathic characteristics in France using the capture-recapture method: a population-based study.” Pain vol. 159,11 (2018): 2394-2402. doi:10.1097/j.pain.0000000000001347
Germany	0.065	DN4 and PainDETECT	Ohayon, Maurice M, and Julia C Stingl. “Prevalence and comorbidity of chronic pain in the German general population.” Journal of psychiatric research vol. 46,4 (2012): 444-50. doi:10.1016/j.jpsychires.2012.01.001
Hong Kong	0.0903	Identification Pain Questionnaire	Wong, Stanley Sau Ching et al. “A comparison of chronic pain with and without neuropathic characteristics in a Hong Kong Chinese population: An analysis of pain related outcomes and patient help seeking behaviour.” PloS one vol. 13,10 e0204054. 24 Oct. 2018, doi:10.1371/journal.pone.0204054
India	0.14	Detailed questionnaire	Saxena, Ashok Kumar et al. “The Prevalence of Chronic Pain among Adults in India.” Indian journal of palliative care vol. 24,4 (2018): 472-477. doi:10.4103/IJPC.IJPC_141_18
Iran	0.137	DN4 (*older population only)	Salman Roghani, Reza et al. “Neuropathic Pain Prevalence of Older Adults in an Urban Area of Iran: A Population-Based Study.” Pain research and treatment vol. 2019 9015695. 2 Jan. 2019, doi:10.1155/2019/9015695
Japan	0.032	PainDETECT	Inoue, S et al. “The prevalence and impact of chronic neuropathic pain on daily and social life: A nationwide study in a Japanese population.” European journal of pain (London, England) vol. 21,4 (2017): 727-737. doi:10.1002/ejp.977
Libya	0.039	LANSS (*phone survey)	Elzahaf, Raga A et al. “The epidemiology of chronic pain in Libya: a cross-sectional telephone survey.” BMC public health vol. 16,1 776. 11 Aug. 2016, doi:10.1186/s12889-016-3349-6
Mali	0.115	DN4 and retrospective study	Maiga, Youssoufa et al. “Neuropathic pain in Mali: The current situation, comprehensive hypothesis, which therapeutic strategy for Africa?.” eNeurologicalSci vol. 22 100312. 9 Jan. 2021, doi:10.1016/j.ensci.2021.100312
Morocco	0.106	DN4	Harifi, Ghita et al. “Prevalence of chronic pain with neuropathic characteristics in the Moroccan general population: a national survey.” Pain medicine (Malden, Mass.) vol. 14,2 (2013): 287-92. doi:10.1111/pme.12009
Nepal	0.127	LANSS	Higgins, Cassie et al. “Cross-sectional study examining the epidemiology of chronic pain in Nepal.” Pain reports vol. 8,2 e1067. 8 Feb. 2023, doi:10.1097/PR9.0000000000001067
Spain	0.118	Primary-care physician evaluation	Pérez, Concepción et al. “Prevalence and characterization of neuropathic pain in a primary-care setting in Spain: a cross-sectional, multicentre, observational study.” Clinical drug investigation vol. 29,7 (2009): 441-450. doi:10.2165/00044011-200929070-00002
Sudan	0.06	Neurologist evaluation and questionnaire	Elsayed, M et al. "The Pattern of Neurological Disorders; Revisited Prevalence Data of a Dedicated Neurology Clinic in Sudan." Case Reports Clin Med 2021;10. doi:10.4236/crcm.2021.1011043
United Kingdom	0.092	DN4 (*UK Biobank)	Baskozos, Georgios et al. “Epidemiology of neuropathic pain: an analysis of prevalence and associated factors in UK Biobank.” Pain reports vol. 8,2 (2023): e1066. doi:10.1097/PR9.0000000000001066
USA	9.8% - 10%	clinical examination; PainDETECT	Yawn, Barbara P et al. “The prevalence of neuropathic pain: clinical evaluation compared with screening tools in a community population.” Pain medicine (Malden, Mass.) vol. 10,3 (2009): 586-93. doi:10.1111/j.1526-4637.2009.00588.x
			DiBonaventura, Marco D et al. “The prevalence of probable neuropathic pain in the US: results from a multimodal general-population health survey.” Journal of pain research vol. 10 2525-2538. 1 Nov. 2017, doi:10.2147/JPR.S127014
